# Supplementary material for: Auxotrophy-based High Throughput Screening assay for the identification of Bacillus subtilis stringent response inhibitors
Source: PubMed Central journal article supplement (PMC5075769; doi:10.1038/srep35824), 2016-10-24
Supplement: srep35824-s1.pdf [file srep35824-s1.pdf]

## Supplementary Information

### **Auxotrophy-based High Throughput Screening assay for the identification of *Bacillus subtilis* stringent response inhibitors**

Liis Andresen<sup>1,2,⌘,\*</sup>, Vallo Varik<sup>1,2,3,⌘</sup>, Yuzuru Tozawa<sup>4</sup>, Steffi Jimmy<sup>1,2</sup>, Stina Lindberg<sup>5</sup>, Tanel Tenson<sup>3</sup> & Vasili Hauryliuk<sup>1,2,3,\*</sup>

<sup>1</sup>Department of Molecular Biology, Umeå University, Building 6K, 6L University Hospital Area, SE-901 87 Umeå, Sweden

<sup>2</sup>Laboratory for Molecular Infection Medicine Sweden (MIMS), Umeå University, Building 6K and 6L, University Hospital Area, SE-901 87 Umeå, Sweden

<sup>3</sup>University of Tartu, Institute of Technology, Nooruse 1, 50411 Tartu, Estonia

<sup>4</sup>Graduate School of Science and Engineering, Saitama University, 255 Shimo-Okubo, Sakura-ku, Saitama, Saitama 338-8570, Japan.

<sup>5</sup>Laboratories for Chemical Biology Umeå (LCBU), Department of Chemistry, Umeå University, SE-901 87 Sweden

⌘denotes equal contribution

\*denotes corresponding authors

#### **Contact details of corresponding authors:**

Liis Andresen: liis.andresen@umu.se, +46702016884

Vasili Hauryliuk: vasili.hauryliuk@umu.se, +46907850807

## Supplementary Methods

### *Preparation of B. subtilis Rel*

*B. subtilis rel* gene coding for (p)ppGpp synthetase was cloned into pET24d plasmid. The protein was overexpressed in *E. coli* BL21(DE3) from pET284d-*rel* plasmid as follows. Single colony was inoculated into 3 ml of LB medium and grown aerobically at 37°C until OD<sub>600</sub>=0.5 in the presence of 50 µg/ml kanamycin (Km). The culture was transferred into 400 ml of fresh pre-warmed 2xYT medium (with 50 µg/ml Km) and grown aerobically at 37°C to OD<sub>600</sub>=0.5. Rel overexpression was induced by addition of IPTG with a final concentration of 1 mM to the culture. The temperature was decreased to 30°C and bacteria were grown for another 1 hour. The bacterial cell mass was collected by centrifugation, resuspended in lysis buffer (50 mM NaH<sub>2</sub>PO<sub>4</sub> pH 7.5, 350 mM NaCl, 2 mM MgCl<sub>2</sub>, 10 mM imidazole, 1 mM 2-mercaptoethanol (βME), 100 µM PMSF and 1 U/ml DNase I) and lysed with Stansted SPCH-10 homogenizer. The lysate was centrifuged and the supernatant was used for Zn-NTA Sepharose affinity chromatography. The elution buffer consisted of 50 mM NaH<sub>2</sub>PO<sub>4</sub> pH 7.5, 1 M NaCl, 2 mM MgCl<sub>2</sub>, 10 mM imidazole, and 1 mM βME. The peak corresponding to Rel protein was collected and loaded on gel filtration column (HiLoad 16/600, Superdex 200 pg). Purified protein was concentrated using Amicon Ultra-15 (Millipore) centrifugal filter devices with a 50 kDa cut-off. The final preparations were aliquoted, snap-frozen with liquid nitrogen and stored at -80°C in storage buffer (25 mM HEPES-KOH, pH 7.5, 0.7 M KCl, 1 mM βME, 5 mM MgCl<sub>2</sub> and 10% glycerol).

### *Enzymatic assays with B. subtilis Rel*

ppGpp synthesis reactions were performed in 1x HEPES:Polymix buffer (25 mM HEPES, 15 mM Mg<sup>2+</sup> and 1 mM βME) and contained 0.5 µM *B. subtilis* ribosomes, 100 µM ppGpp, 300 µM <sup>3</sup>H-labelled GDP, 0.1 µM Rel, 0.12 µg/ml polyU mRNA, 2 µM tRNA<sup>Phe</sup> and 0-50 µM compound C302. The reaction mixture was pre-incubated at 37°C for 2 min and started by addition of 1 mM ATP. At each time points 5 µl of reaction mixture was quenched with 70% formic acid and analyzed by TLC.

### *Thin layer chromatography (TLC) analysis of nucleotide mixtures*

Rel ppGpp synthesis activity was followed by separating reaction mixtures on TLC analysis followed by scintillation counting according to Mechold and colleagues, with modifications<sup>1</sup>. At each time point 5 µl of reaction mixture was quenched by addition of 4 µl 70% formic acid supplemented with a cold nucleotide standard used for UV-shadowing (10 mM GDP and 10 mM GTP) and spotted on PEI-TLC plates (Macherey-Nagel). TLC was run in 0.5 M KH<sub>2</sub>PO<sub>4</sub>. The plates were dried and cut into sections guided by UV-shadowing and <sup>3</sup>H radioactivity was quantified by scintillation counting. Conversion of substrate to product was quantified as described in the Shyp et al. (2012)<sup>2</sup>.

## R code for detection of growth inhibition

```
### Load required libraries ###
library(readxl); library(plyr); library(dplyr); library(zoo)

### Read in and clean the data ###
temp <- list.files(pattern="*.xls") # Point to the files
raw_data <- lapply(temp, read_excel)
raw_df <- ldply(raw_data, data.frame) # Turn into one data frame
df <- raw_df[, c(3, 6)] # Take well ID and OD value
df <- cbind(Plate = rep(1:(length(df[,1])/384), each=384), df) # Plate index
df <- rename(df, OD = Abs600..0.1s...A.) # Give a clean name to OD column

### Split the data ###
# Set data filters for medium, dSAS, ppGpp0
pos.medium <- paste(LETTERS[1:16], rep(c("01", "24"), each=16), sep="")
pos.dSAS <- paste(LETTERS[1:16], rep("02", 16), sep="")
pos.ppGpp0 <- paste(LETTERS[1:16], rep("23", 16), sep="")
# Take compound wells
df_cmp <- filter(df, !Well %in% c(pos.medium, pos.dSAS, pos.ppGpp0))
df_cmp <- cbind(PlateWell=paste(df_cmp[,1],
df_cmp[,2], sep="_"), OD=df_cmp[,3]) # Merge, plate_well index

### Find local outliers by Median Absolute Deviation (MAD) threshold ###
# MAD function to identify local outliers
localt <- function(x) {m = median(x); m - threshold * median(abs(x - m))}
window <- 19 # Set an arbitrary window, how many adjacent wells?
threshold <- 8 # Set an arbitrary threshold, how many times MAD?
# Calculate threshold for each well
zt <- rollapply(df_cmp[,2], window, localt, align="center")
# Fill in start and end gaps, quick and dirty
zt <- c(rep(zt[1], window/2), zt, rep(zt[length(zt)], window/2))

### Assign local outliers a MAD based score ###
# MAD function without threshold
localmad <- function(x) {m = median(x); m - median(abs(x - m))}
zmad <- rollapply(df_cmp[,2], window, localmad, align="center")
zmad <- c(rep(zmad[1], window/2), zmad, rep(zmad[length(zmad)], window/2))
zmed <- rollapply(df_cmp[,2], window, median, align="center")
zmed <- c(rep(zmed[1], window/2), zmed, rep(zmed[length(zmed)], window/2))
mad.score <- (zmed - df_cmp[,2])/(zmed - zmad) # MAD score
df_cmp <- cbind(df_cmp, "Score"=mad.score) # Add MAD score to data frame

#### Store and view outliers in a table ####
out <- filter(df_cmp, OD<zt); View(out, "Outliers")

### Optional feature: plot MAD threshold outliers ###
plot(df_cmp$OD, type="l", lwd=1, col="red", ylab="OD") # OD values
lines(seq_along(df_cmp$OD), zt[,], col="gray") # Threshold
points(seq_along(df_cmp$OD)[df_cmp$OD<zt],
filter(df_cmp, OD<zt)[[2]], pch=19) # Outliers
```

| Description                                                                              | Structure |
|------------------------------------------------------------------------------------------|-----------|
| ①<br>PubChem CID 460749<br>Rel. growth S7-V 0.026±0.053<br>Rel. growth S7-K 0.097±0.067  |           |
| ②<br>PubChem CID 1280225<br>Rel. growth S7-V 0.313±0.033<br>Rel. growth S7-K 0.142±0.11  |           |
| ③<br>PubChem CID 2838793<br>Rel. growth S7-V 0.189±0.07<br>Rel. growth S7-K 0.304±0.07   |           |
| ④<br>PubChem CID 2838688<br>Rel. growth S7-V 0.332±0.037<br>Rel. growth S7-K 0.181±0.096 |           |
| ⑤<br>PubChem CID 2861171<br>Rel. growth S7-V 0.447±0.01<br>Rel. growth S7-K 0.288±0.04   |           |
| ⑥<br>PubChem CID 2849148<br>Rel. growth S7-V 0.449±0.032<br>Rel. growth S7-K 0.348±0.004 |           |
| ⑦<br>PubChem CID 1327332<br>Rel. growth S7-V 0.261±0.043<br>Rel. growth S7-K 0.260±0.139 |           |
| ⑧<br>PubChem CID 2851950<br>Rel. growth S7-V 0.441±0.09<br>Rel. growth S7-K 0.353±0.093  |           |
| ⑨<br>PubChem CID 747531<br>Rel. growth S7-V 0.272±0.138<br>Rel. growth S7-K 0.599±0.039  |           |
| ⑩<br>PubChem CID 2896977<br>Rel. growth S7-V 0.296±0.009<br>Rel. growth S7-K 0.501±0.007 |           |
| ⑪<br>PubChem CID 2884570<br>Rel. growth S7-V 0.466±0.052<br>Rel. growth S7-K 0.549±0.058 |           |
| ⑫<br>PubChem CID 1245053<br>Rel. growth S7-V 0.501±0.007<br>Rel. growth S7-K 0.406±0.004 |           |

**Supplementary Table 1 | Structures and growth effects of general antimicrobials.** Our secondary screen identified 12 compounds that significantly inhibited *B. subtilis* growth in S7-V as well as S7-K media. Rel. growth indicates relative growth where 0 – no growth, 1 – growth of the untreated control. Values indicate mean values of relative growth of 2 replicates ± standard deviation.

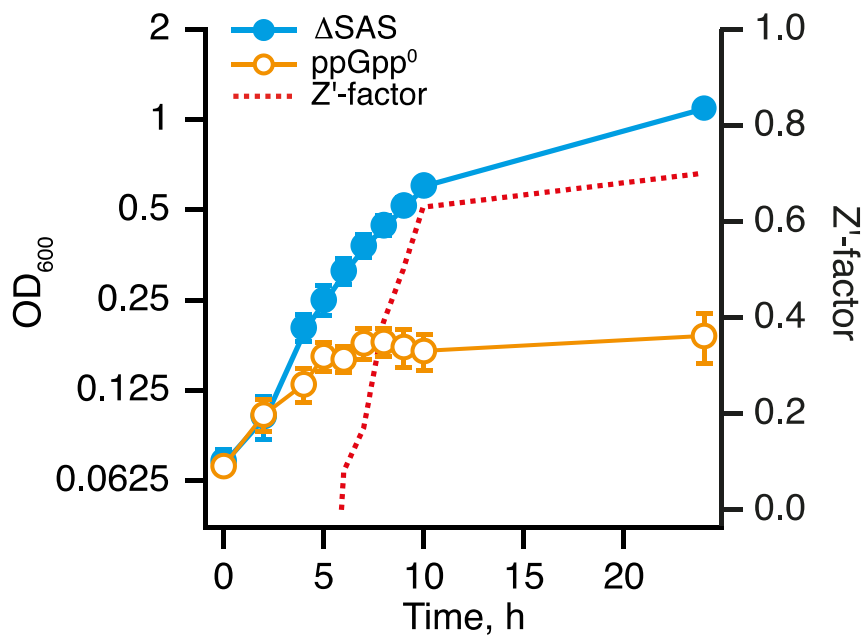

**Supplementary Figure 1 | Auxotrophy-based HTS assay for Rel inhibitors in 384-well format.** *B. subtilis* strain RIK1002<sup>3</sup> lacking SAS YjbM and YwaC ( $\Delta$ SAS, blue filled circles) as well ppGpp-deficient strain RIK1003<sup>3</sup> lacking both SAS and long RSH Rel (ppGpp<sup>0</sup>, red empty circles) were grown in S7 medium supplemented with 1% glucose and 19 amino acids mixture lacking L-valine (S7-V). Traces show an arithmetic mean OD<sub>600</sub> values and standard deviations of 4 technical replicates. Z'-factor (red dashed line) was calculated according to Zhang and colleagues<sup>4</sup>.

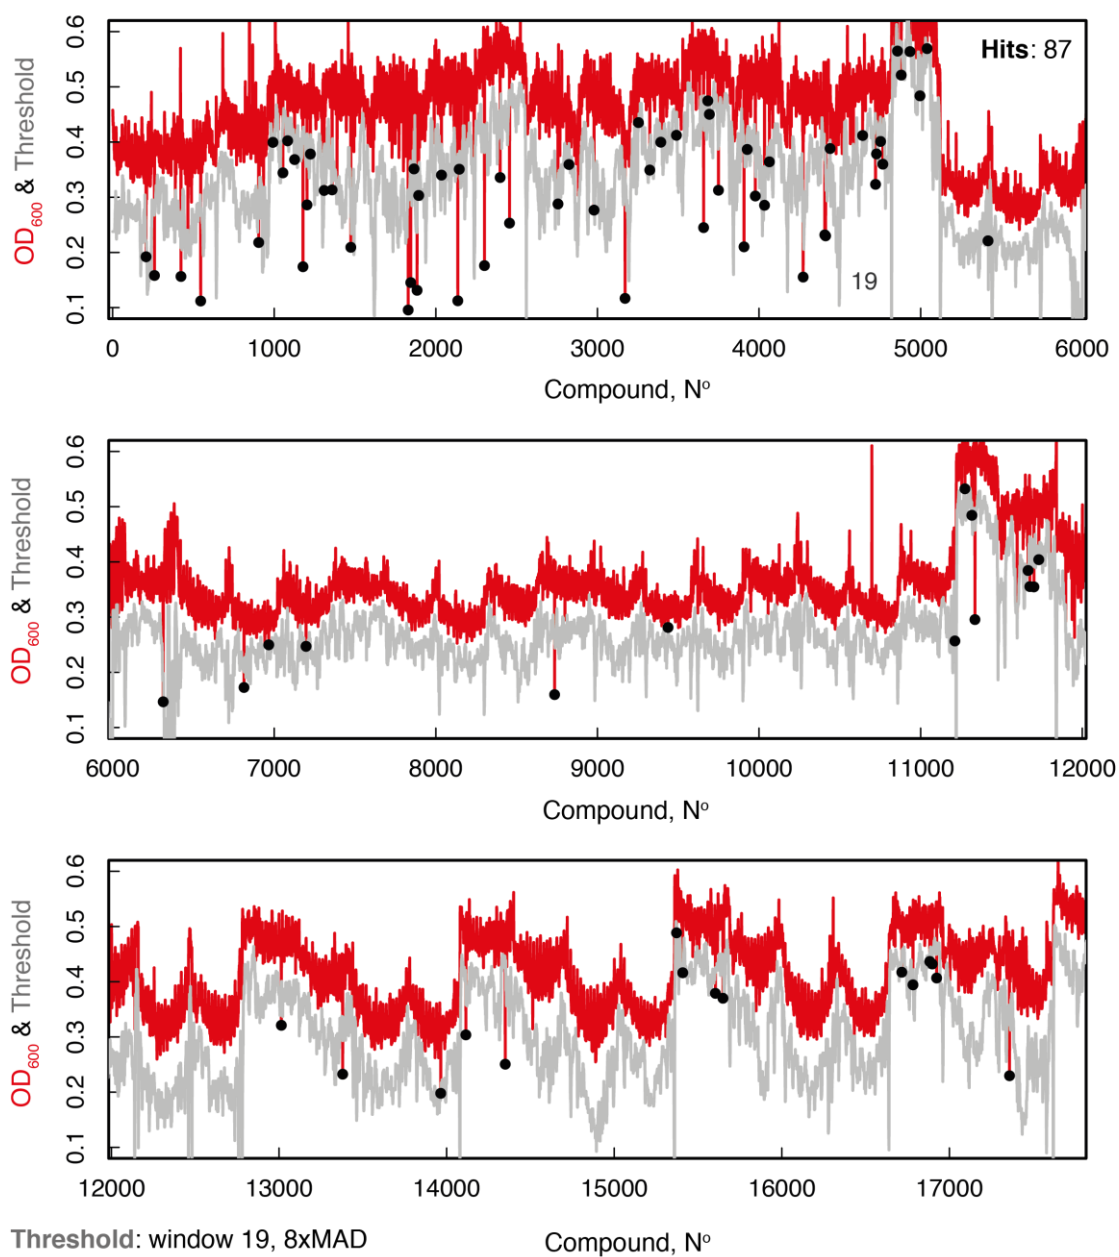

**Supplementary Figure 2 | Graphical output of the HTS hit detection script.** Red trace represents input (acquired  $OD_{600}$  values), grey trace is calculated threshold for every position in a given window. Black filled circles represent  $OD_{600}$  value of hits. 87 hits indicated by black dots are acquired with the following settings: window 19, threshold 8xMAD.

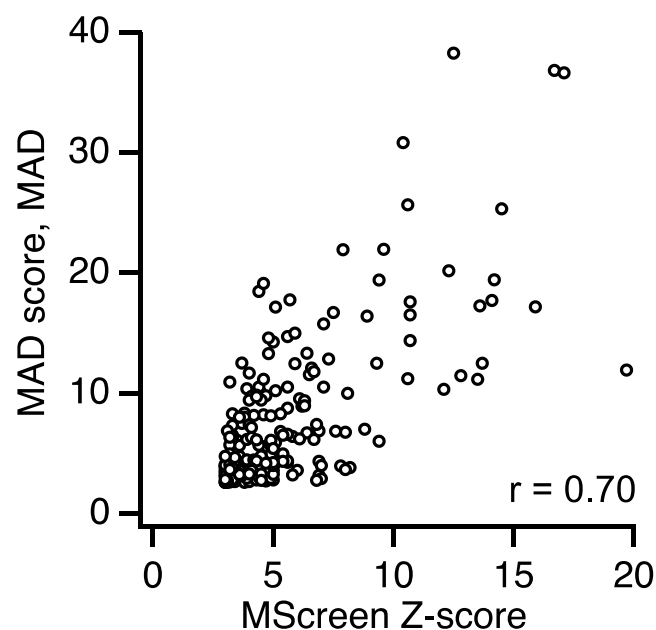

**Supplementary Figure 3 | Correlation between MScreen<sup>5</sup> and MAD score strategies used to identify hit compounds in the primary screen.** MAD score reflects the OD<sub>600</sub> deviation of a well from the median OD<sub>600</sub> calculated for a 19-well sliding window and is expressed in MAD units. Z-score of MScreen<sup>5</sup> reflects the deviation of the OD<sub>600</sub> of a well from the mean OD<sub>600</sub> calculated for the whole plate. Both scores take into account only wells with compounds added. r – Pearson’s product-moment correlation coefficient.

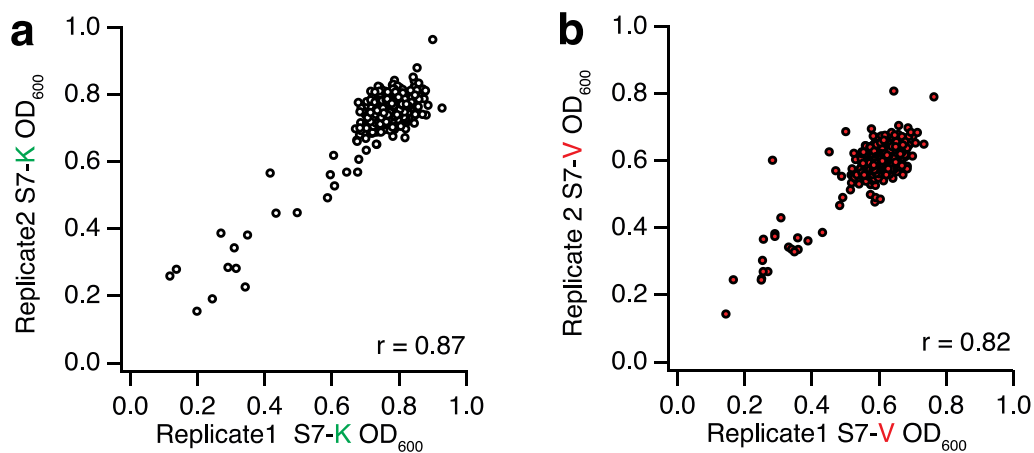

**Supplementary Figure 4 | Reproducibility of the two replicates of the secondary screen for Rel inhibitors.** 480 hit compounds identified in the primary screen were tested for growth inhibition in S7-K (**a**) and S7-V (**b**) media. *ΔSAS B. subtilis* was grown in S7-V and S7-K liquid media on 384-well plates in the presence of 10 μM test compounds compound and 0.9 % DMSO. OD<sub>600</sub> values were scored after 9 hours at 37°C. r – Pearson’s product-moment correlation coefficient.



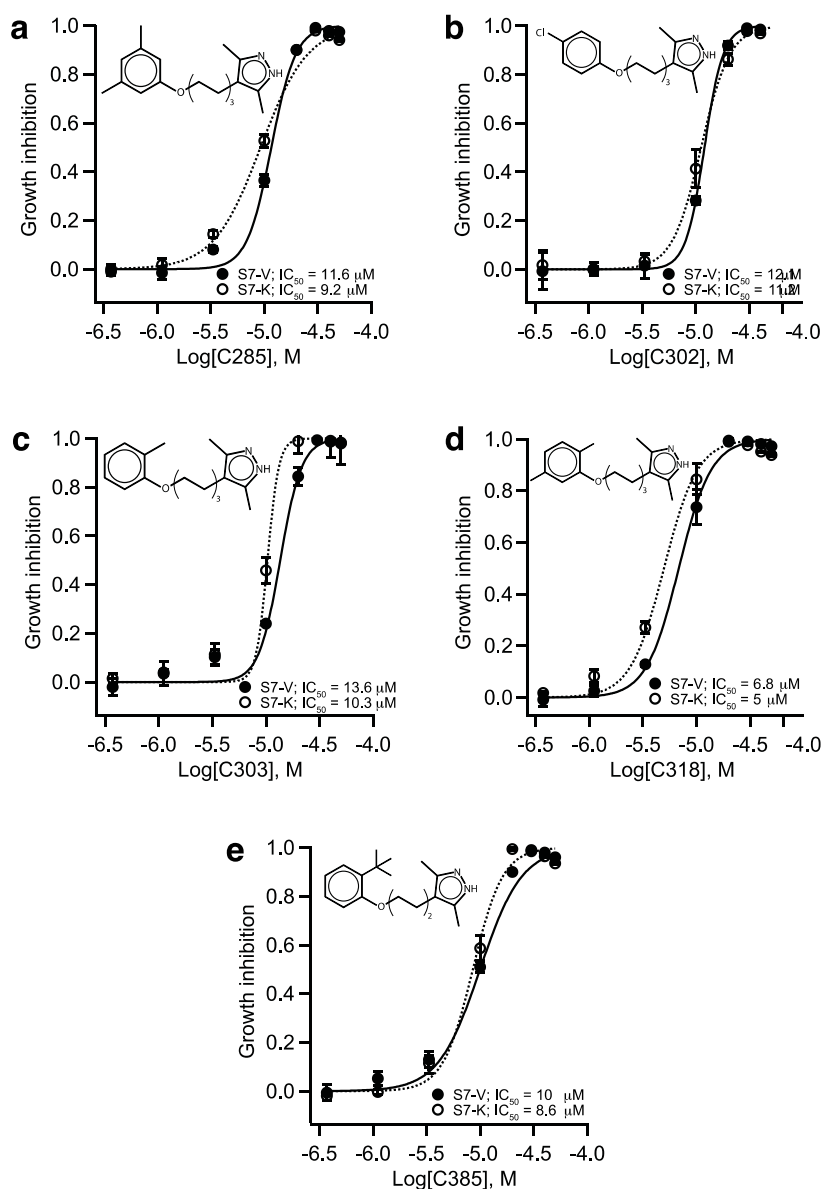

**Supplementary Figure 5 | Dose-response curves for the hit compounds.** 4-(6-alkyl)-3,5-dimethyl-1H-pyrazoles identified by our HTS as potential stringent response inhibitors were tested in dose-response assay. Compounds were serially diluted in DMSO and tested for growth inhibition in screening conditions, except final concentration of the compound varied from 0 to 50 μM, and the experiments were performed in 96-well format in presence of 1.3% DMSO.

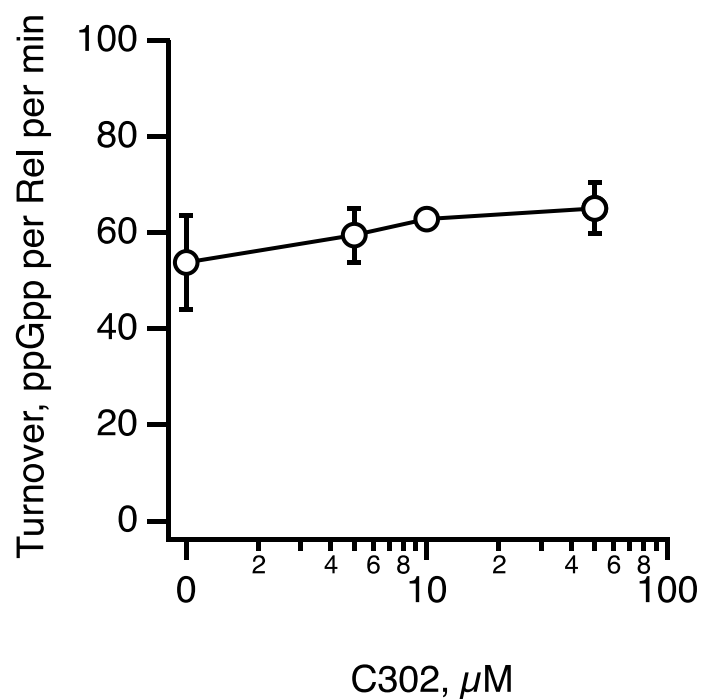

**Supplementary Figure 6 | Hit compounds do not inhibit *Bacillus subtilis* Rel ppGpp synthetase activity *in vitro*.** ppGpp synthesis reactions in presence of increasing concentrations of C302 (0-50  $\mu\text{M}$ ) were performed in 1x HEPES:Polymix buffer (25 mM HEPES, 15 mM  $\text{Mg}^{2+}$  and 1 mM  $\beta\text{ME}$ ) and contained 0.5  $\mu\text{M}$  *B. subtilis* ribosomes, 100  $\mu\text{M}$  ppGpp, 300  $\mu\text{M}$   $^3\text{H}$ -labelled GDP, 0.1  $\mu\text{M}$  Rel, 0.12  $\mu\text{g/ml}$  polyU mRNA, 2  $\mu\text{M}$   $\text{tRNA}^{\text{Phe}}$ . The reaction mixture was pre-incubated at 37°C for 2 min and started by addition of 1 mM ATP. At each time points 5  $\mu\text{l}$  of reaction mixture was quenched with 70% formic acid and analyzed by TLC.

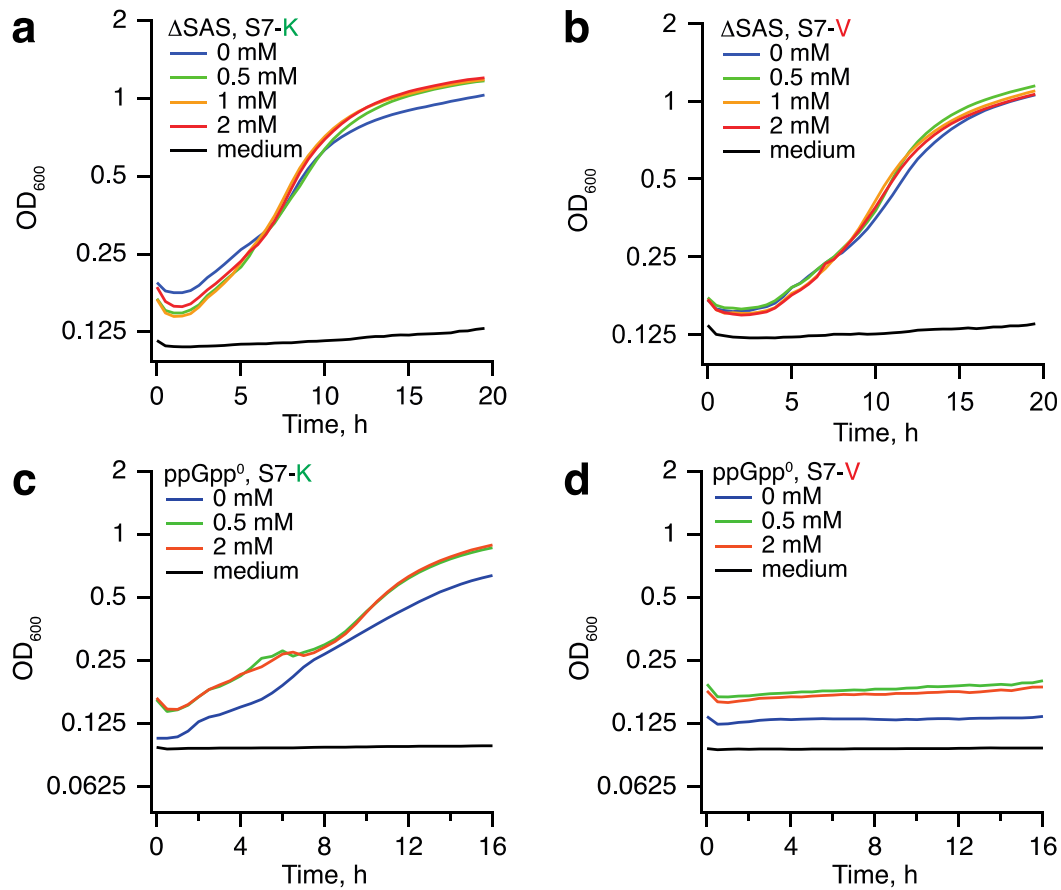

**Supplementary Figure 7 | Relacin does not pass the selection criteria for a selective Rel inhibitor of the current auxotrophy-based HTS.** Growth of  $\Delta$ SAS (a, b) and ppGpp<sup>0</sup> (b, d) *B. subtilis* was followed in S7-K (a, c) and S7-V (b, d) in the presence of increasing concentrations of Relacin<sup>6</sup>. Even at 2 mM Relacin fails to inhibit  $\Delta$ SAS growth in S7-V (b), and has little effect on growth of the ppGpp<sup>0</sup> strain regardless the media (c, d).

## Supplementary References

1. Mechold, U., Murphy, H., Brown, L. & Cashel, M. Intramolecular regulation of the opposing (p)ppGpp catalytic activities of Rel(Seq), the Rel/Spo enzyme from *Streptococcus equisimilis*. *J Bacteriol* **184**, 2878-88 (2002).
2. Shyp, V. et al. Positive allosteric feedback regulation of the stringent response enzyme RelA by its product. *EMBO Rep* **13**, 835-9 (2012).
3. Nanamiya, H. et al. Identification and functional analysis of novel (p)ppGpp synthetase genes in *Bacillus subtilis*. *Mol Microbiol* **67**, 291-304 (2008).
4. Zhang, J.H., Chung, T.D. & Oldenburg, K.R. A Simple Statistical Parameter for Use in Evaluation and Validation of High Throughput Screening Assays. *J Biomol Screen* **4**, 67-73 (1999).
5. Jacob, R.T. et al. MScreen: an integrated compound management and high-throughput screening data storage and analysis system. *J Biomol Screen* **17**, 1080-7 (2012).
6. Wexselblatt, E. et al. Relacin, a novel antibacterial agent targeting the Stringent Response. *PLoS Pathog* **8**, e1002925 (2012).
